# Supplementary material for: Light Triggers the Antiproliferative Activity of Naphthalimide-Conjugated (η6-arene)ruthenium(II) Complexes
Source: MDPI journal article supplement (doi:10.3390/ijms23147624), 2022-07-10
Supplement: s1 [file s1]

# Light Triggers the Antiproliferative Activity of Naphthalimide-Conjugated ( $\eta^6$ -arene)ruthenium(II) Complexes

Franco Bisceglie <sup>1,2,\*</sup>, Giorgio Pelosi <sup>1,2</sup>, Nicolò Orsoni <sup>1</sup>, Marianna Pioli <sup>1</sup>, Mauro Carcelli <sup>1</sup>, Paolo Pelagatti <sup>1</sup>, Silvana Pinelli <sup>3</sup> and Peter J. Sadler <sup>4</sup>

**Table S1.** Chemical shift of the methylene group in the complexes and their ligands.

|              | <b>C</b> | <b>L</b> |
|--------------|----------|----------|
| <b>C1/L1</b> | 5.16 ppm | 5.32 ppm |
| <b>C2/L2</b> | 5.17 ppm | 5.30 ppm |
| <b>C3/L4</b> | 5.13 ppm | 5.27 ppm |

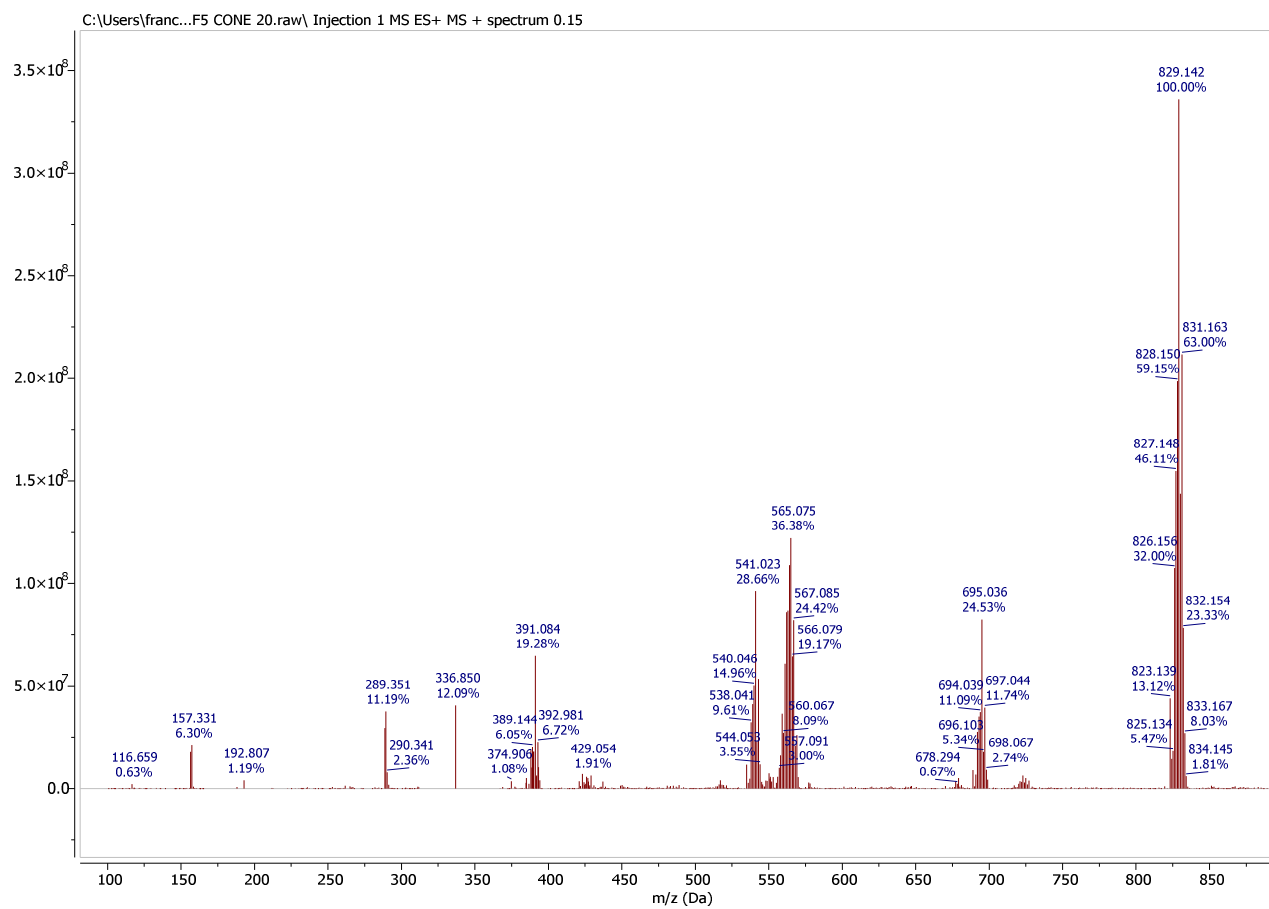

**Figure S1.** Full ESI mass spectrum of compound C1.

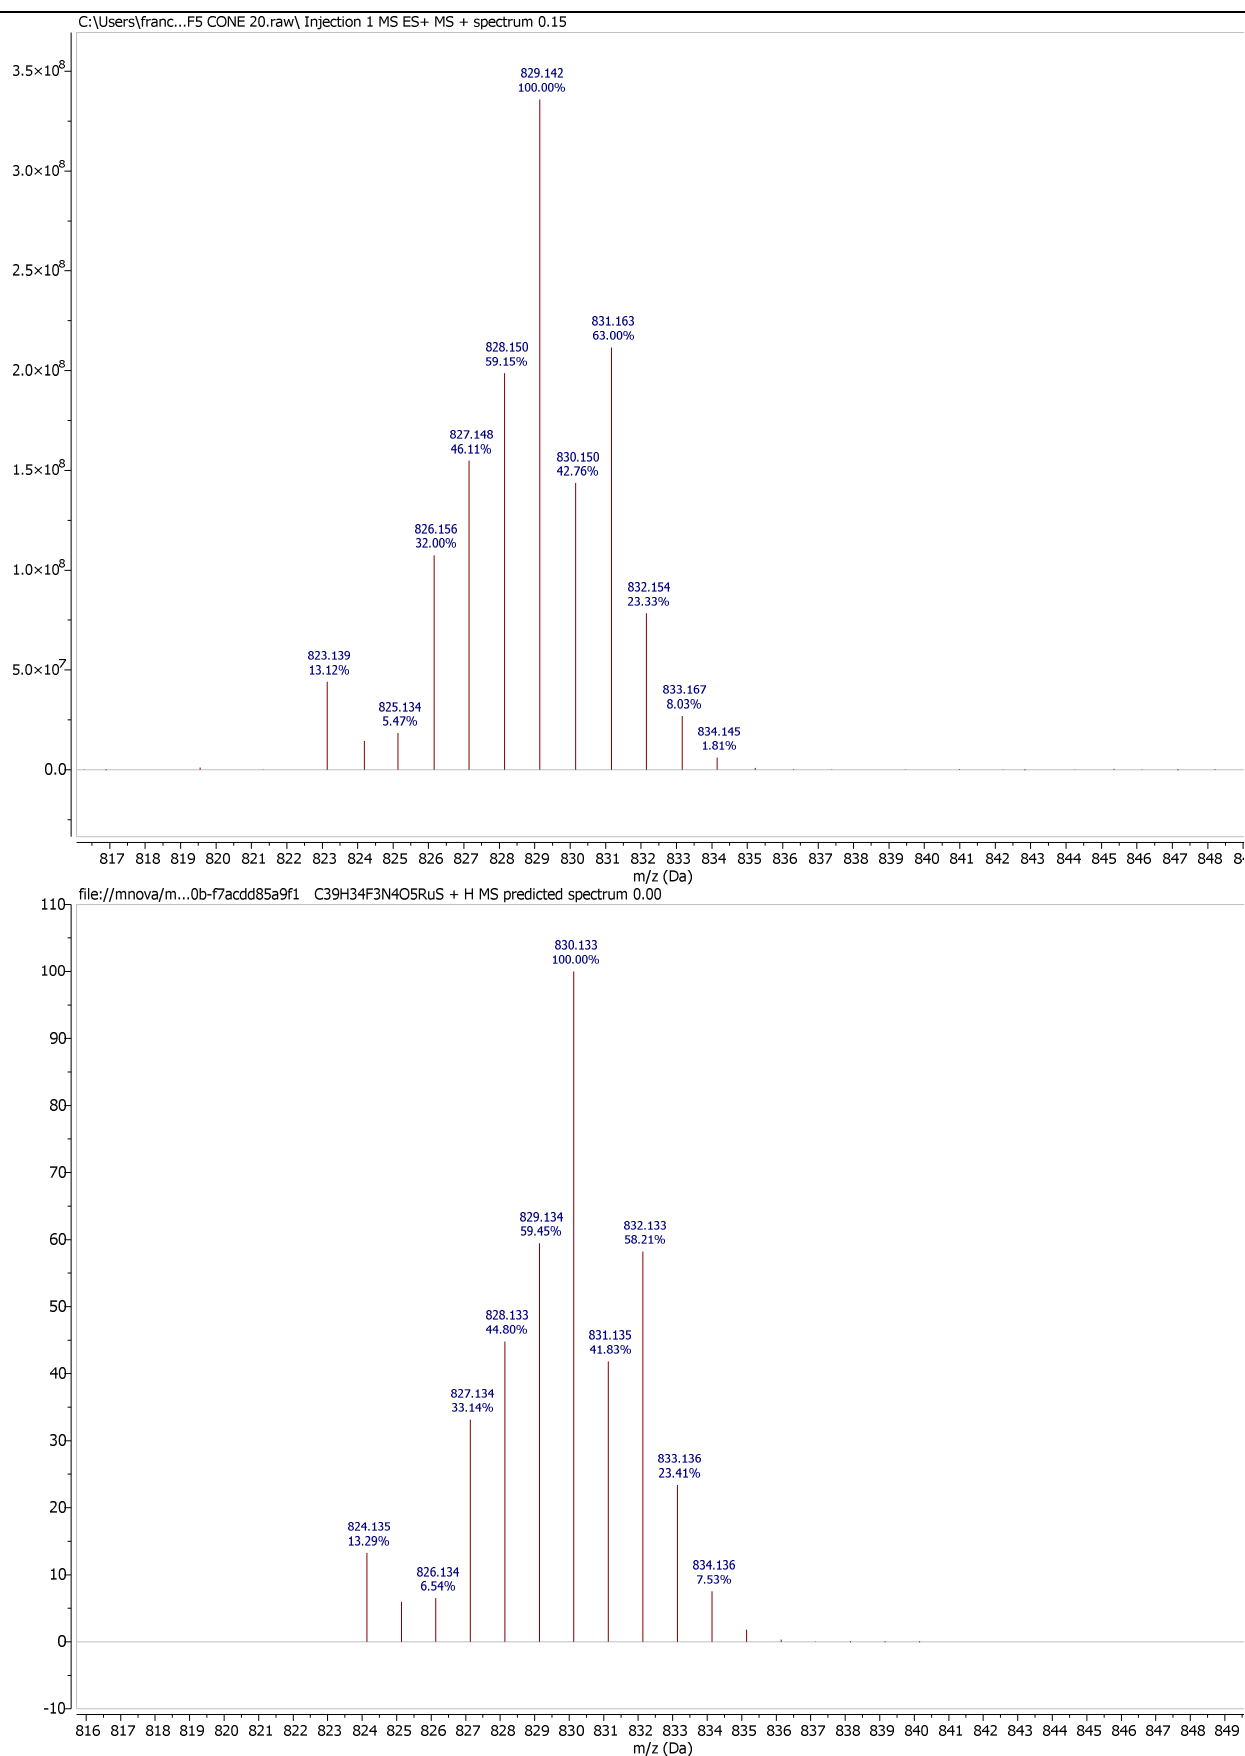

**Figure S2.** Comparison of the experimental (above) and calculated (below) isotope patterns for key ESI-MS signals for compound C1.

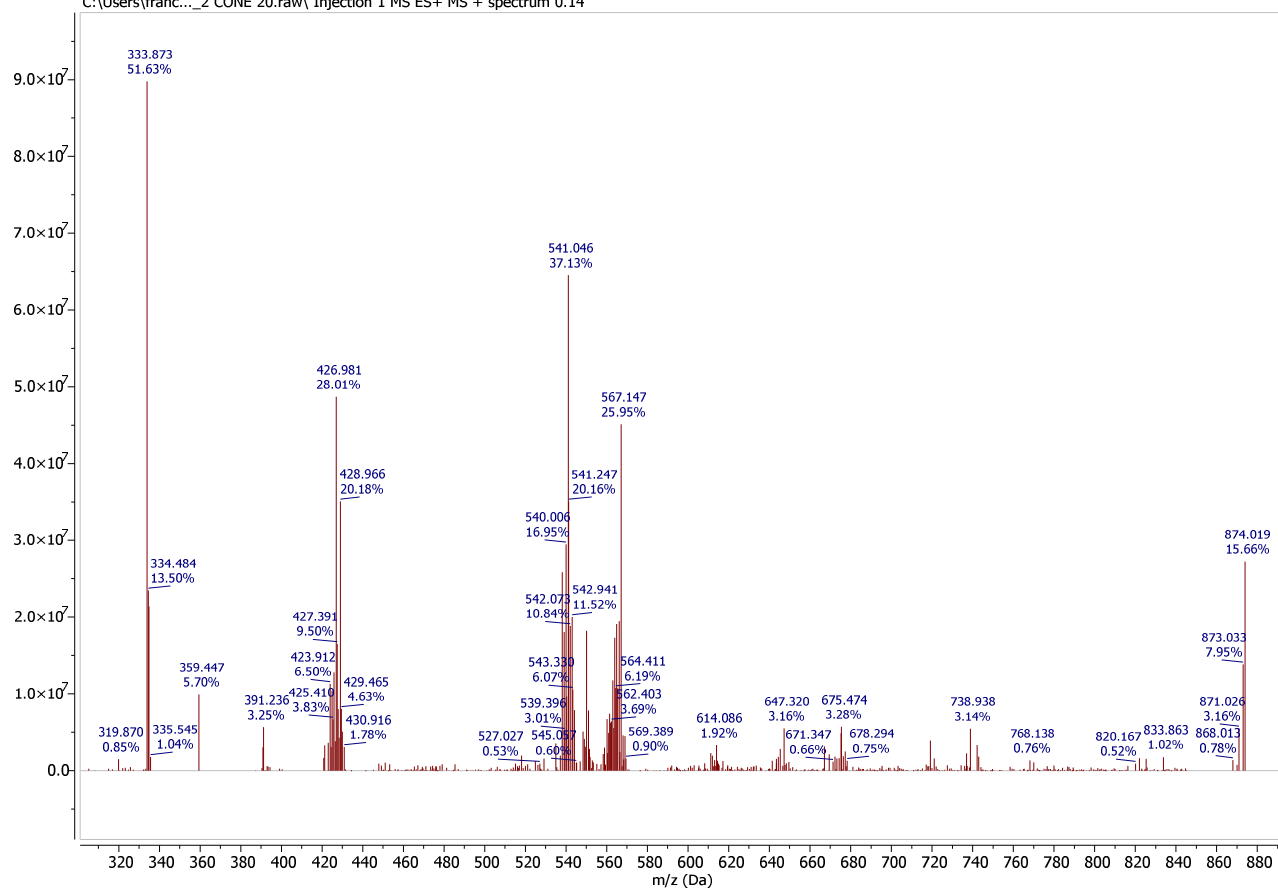

**Figure S3.** Full ESI mass spectrum of compound C2.

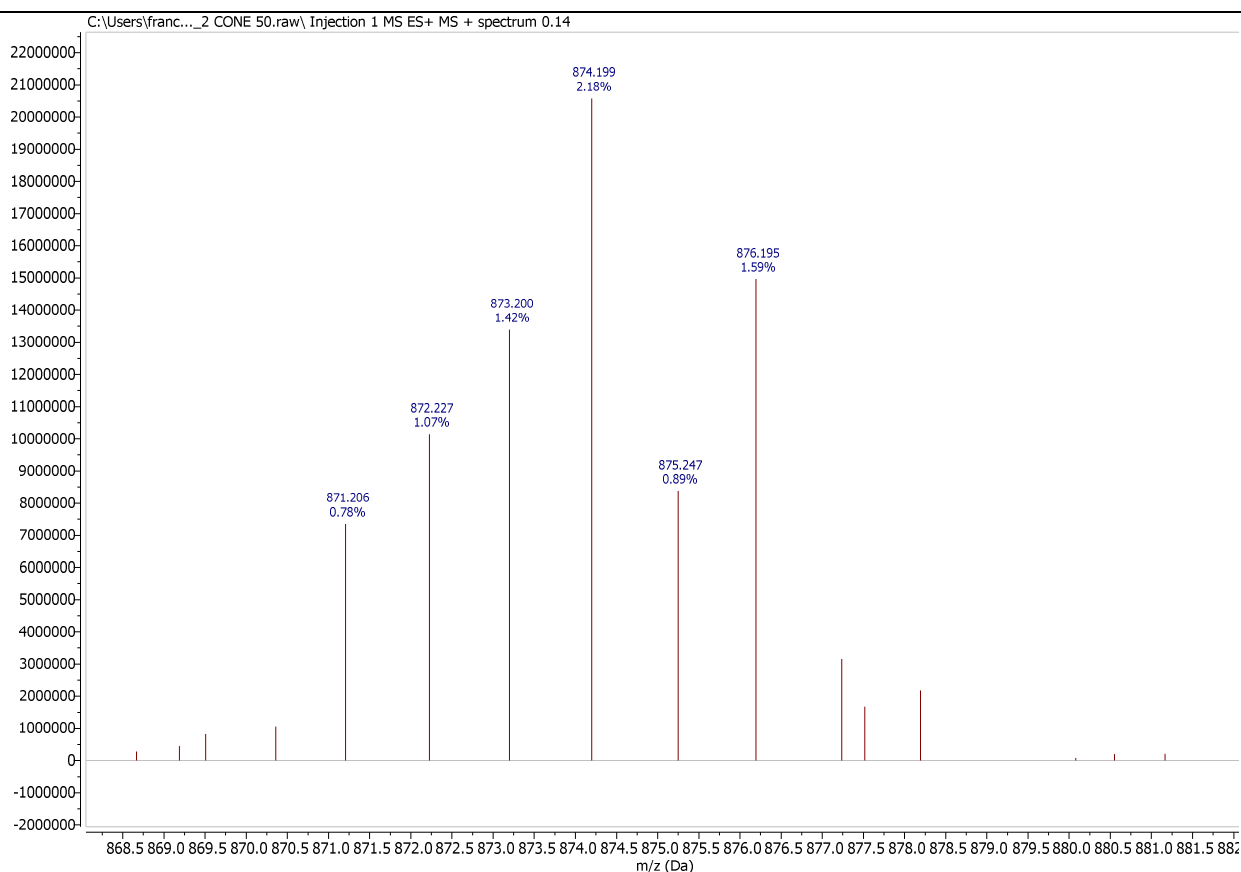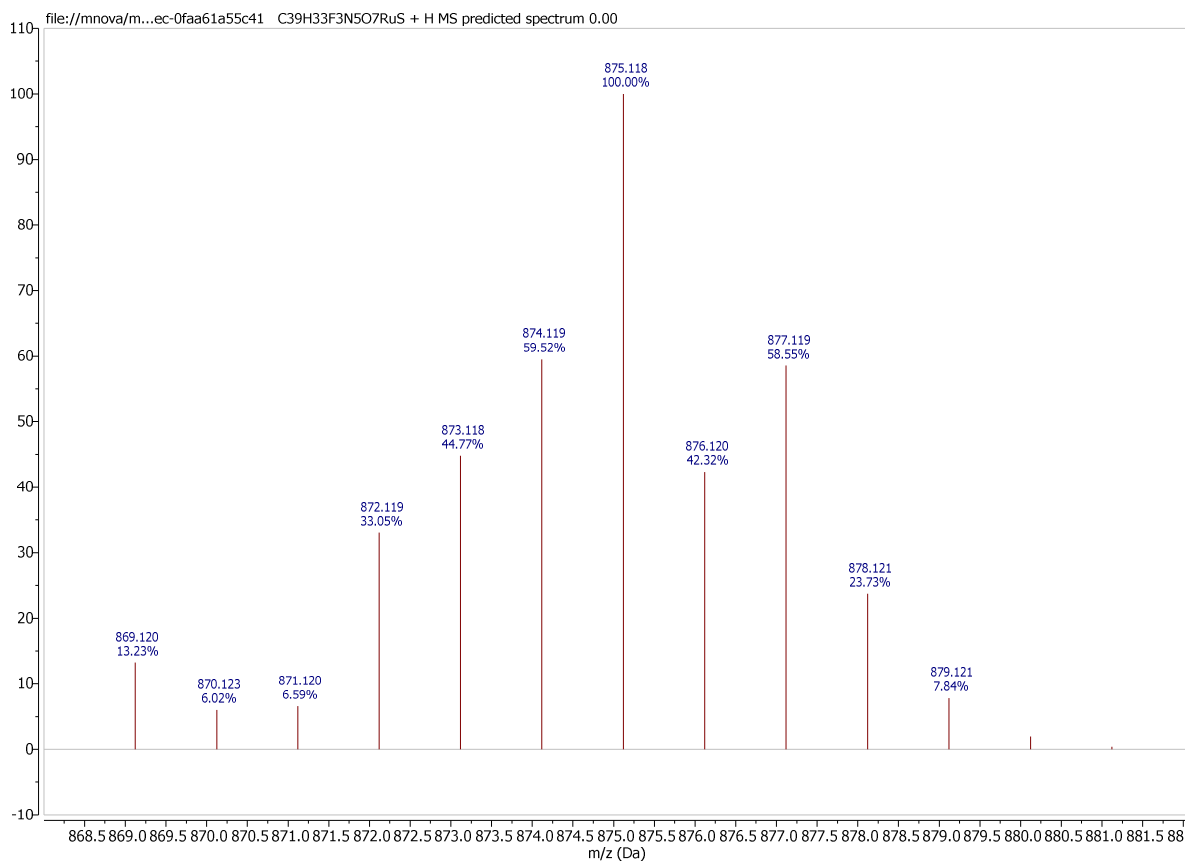

**Figure S4.** Comparison of the experimental (above) and calculated (below) isotope patterns for key ESI-MS signals for compound C2.

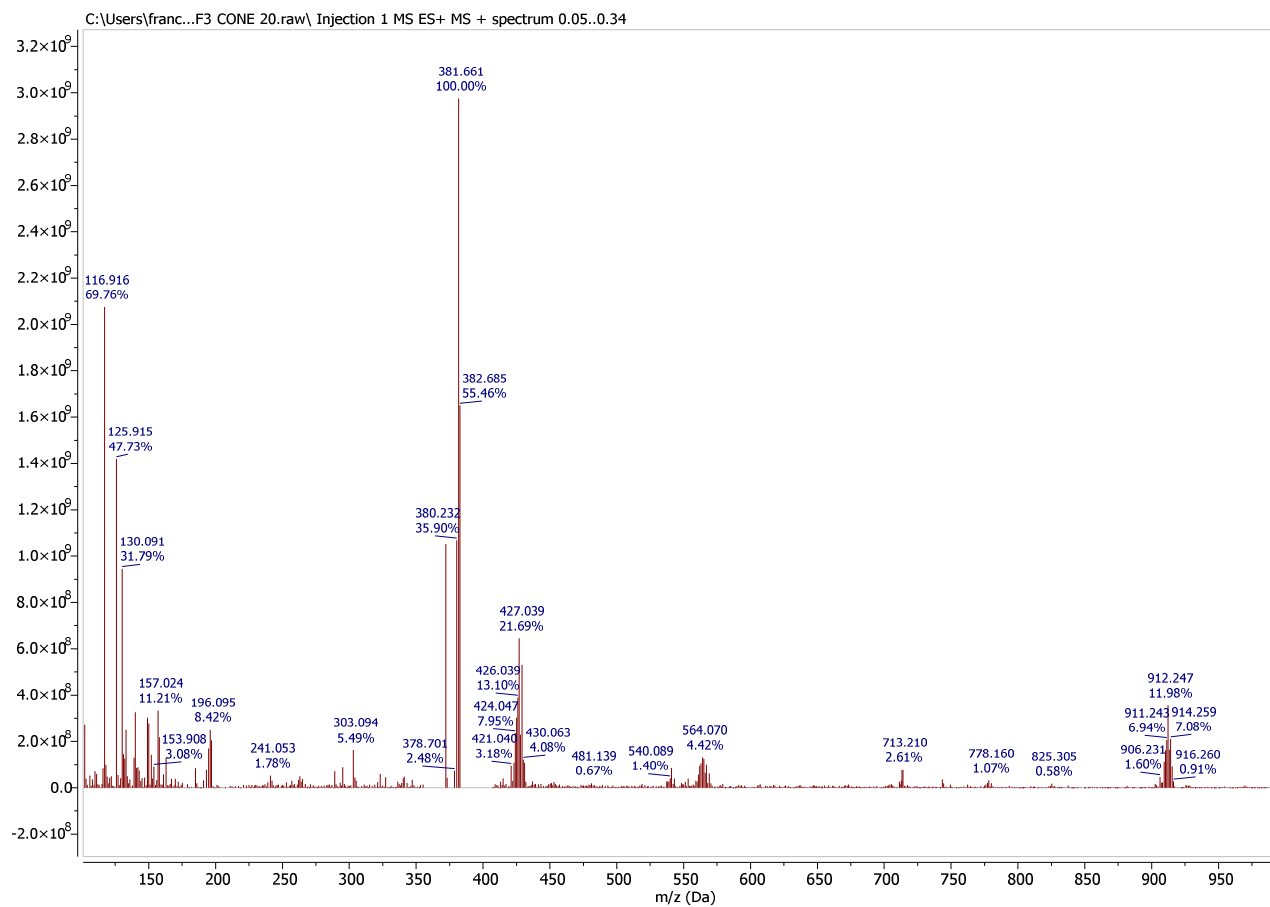

Figure S5. Full ESI mass spectrum of compound C3.

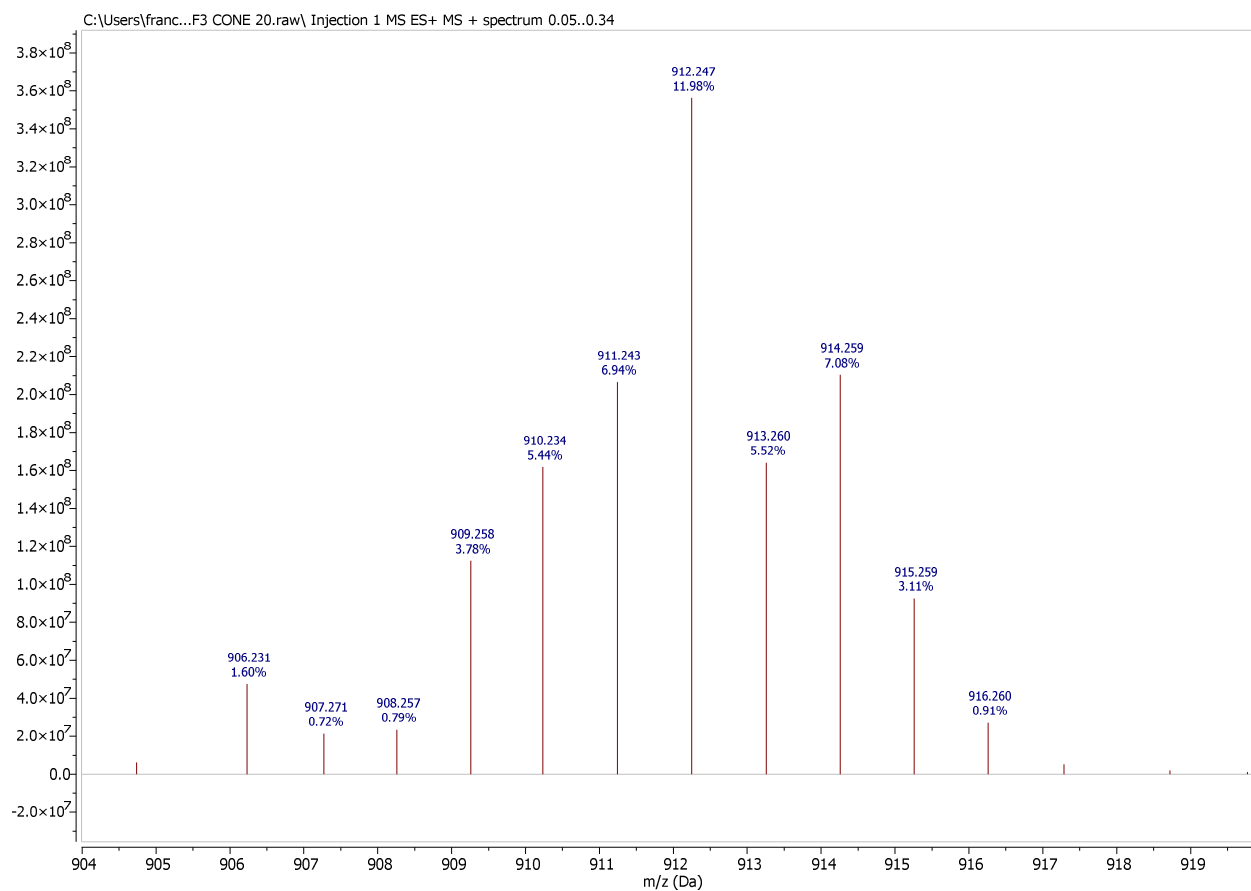

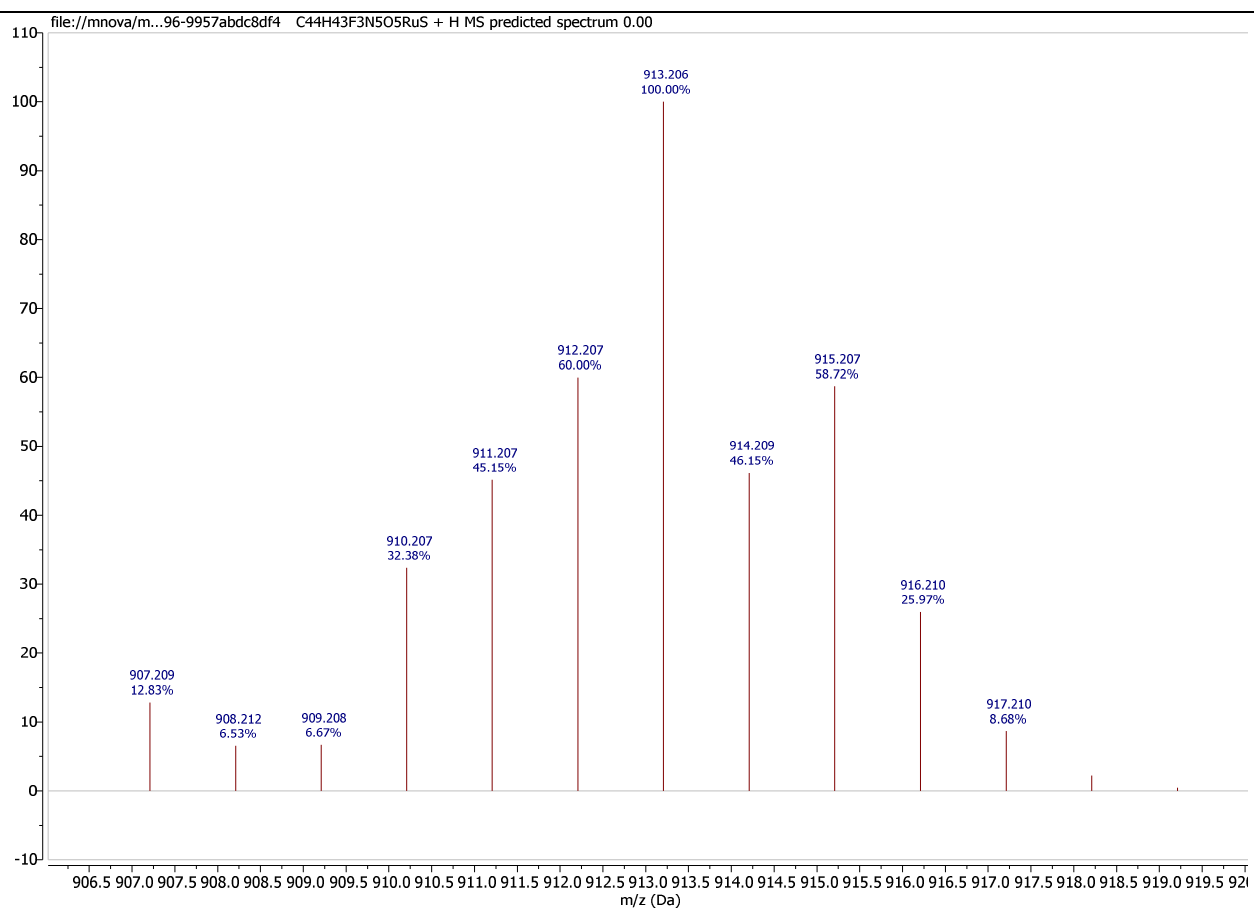

**Figure S6.** Comparison of the experimental (above) and calculated (below) isotope patterns for key ESI-MS signals for compound C3.



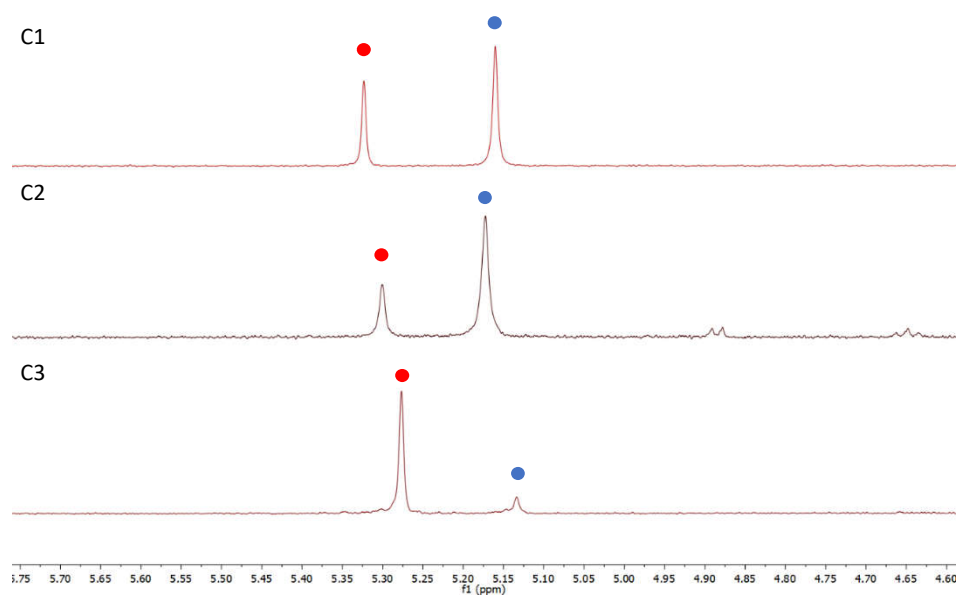

**Figure S7.** Comparison of the naphthalimide release in C1, C2 and C3 after 3 hours of irradiation.
